# Supplementary material for: A class of secreted mammalian peptides with potential to expand cell-cell communication
Source: PubMed Central journal article supplement — bioRxiv. 2023 Jun 7:2023.06.02.543503. Preprint. [Version 2] doi: 10.1101/2023.06.02.543503 (PMC10274650; doi:10.1101/2023.06.02.543503), 2023-06-07
Supplement: NIHPP2023.06.02.543503v2-supplement-1.pdf [file NIHPP2023.06.02.543503v2-supplement-1.pdf]

## Supplemental Information

**Fig. S1. Comparison of C-terminal amidated and carboxy CAP-TAC1 with targeted LCMSMS method.** The 463.2 m/z b4 extracted ion chromatograms for mouse plasma, the carboxy synthetic standard, and amidated synthetic standard (m/z = 724.3 parent ion with 1.3 m/z isolation window).

**Fig. S2. Determination of capped peptide sequence repeats in whole mouse proteome.** Distribution of the number of precursor proteins (1, 2, or 3) the detected mouse capped peptide sequences (detected sequence + glycine-dibasic motif, N=64) are found in by a BlastP search.

**Fig. S3. Additional measurements from metabolic chambers of mice treated with CAP-GDF15.** (A,B) VO<sub>2</sub> (A) and VCO<sub>2</sub> (B) of 12-16-week diet-induced obese male mice following a single treatment of CAP-GDF15 (50 mg/kg, intraperitoneal) or vehicle control. (C,D) VO<sub>2</sub> (C) and VCO<sub>2</sub> (D) of 12-16-week diet-induced obese male mice following a single treatment of scrambled CAP-GDF15 (50 mg/kg, intraperitoneal, scrambled sequence: pQGLEALRARLRV-NH<sub>2</sub>) or vehicle control. Data are shown as means ± SEM. For (A-B), N=12/group; for (C-D), N=8/group. For (A-D), injection occurred at time T=0 (5:00pm) and data was collected for the subsequent 16 hrs.

**Fig. S4. Prediction, detection, and composition analysis of human capped peptides.** (A) Schematic of numbers of predicted human capped peptides. (B) Quantification of detectable human capped peptide concentrations in human plasma (N=3). (C) Comparison of frequency of each amino acid between human capped peptides and known peptide hormones. For (B), data are shown as means ± SEM, N=3.

**Fig. S5. Tissue distribution of mRNAs for home genes corresponding to human capped peptide.** H-clustered heat map of mRNA expression for capped peptide preproprecursor home genes across human tissues and cell types, using GTEx as the reference database.

**Table S1.** List of classically secreted mouse proteins from Uniprot.

**Table S2.** Predicted and detected mouse capped peptides.

**Table S3.** List of known peptide hormones and neuropeptides from Uniprot.

**Table S4.** List of classically secreted human proteins from Uniprot.

**Table S5.** Predicted and detected human capped peptides.

Extracted fragment ion 724.3  $\rightarrow$  463.2 m/z chromatogram

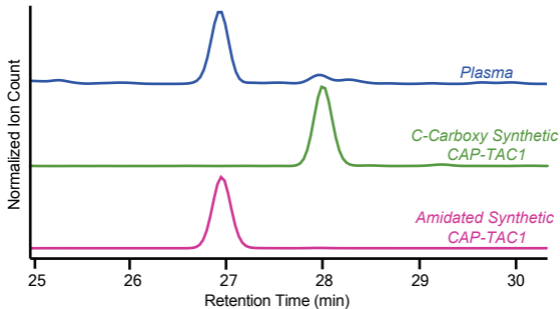

Fig. S1

**A**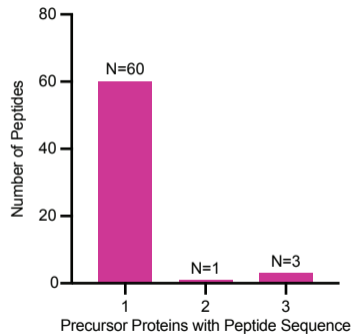**B**

Alignment of capped peptides that appear >1 time in the proteome

### CAP-DEFA-RS7

...QDAALGWGRR... DEFA-RS7  
 ...QDAALGWGRR... DEFA-RS2

### CAP-EPHB6

...QPRGRR... EPHB6  
 ...QPRGRR... CILP2  
 ...QPRGRR... KIFC2

### CAP-FGF18

...QVLGRR... FGF18  
 ...QVLGRR... TP73  
 ...QVLGRR... TP63

### CAP-WNT3A

...QFRGRR... WNT3A  
 ...QFRGRR... WNT3  
 ...QFRGRR... MGAT1

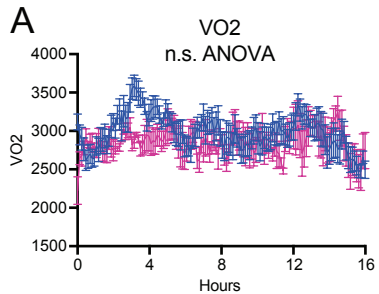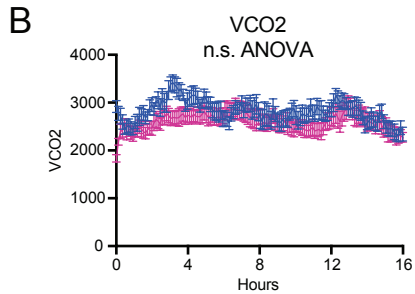

— Vehicle  
— 50 mg/kg CAP-GDF15

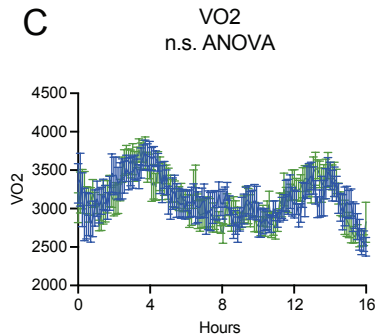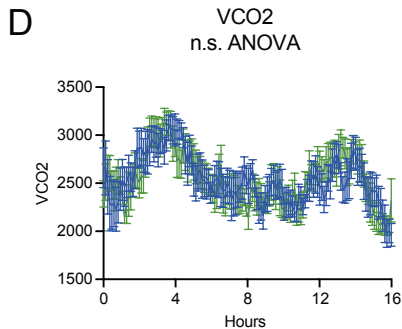

— Vehicle  
— 50 mg/kg Scrambled  
CAP-GDF15

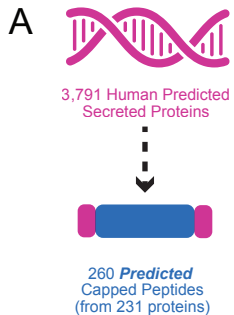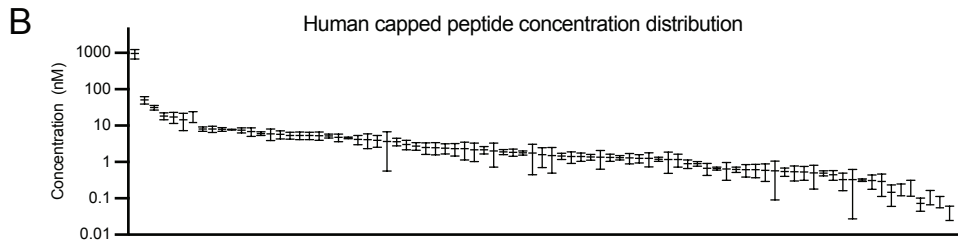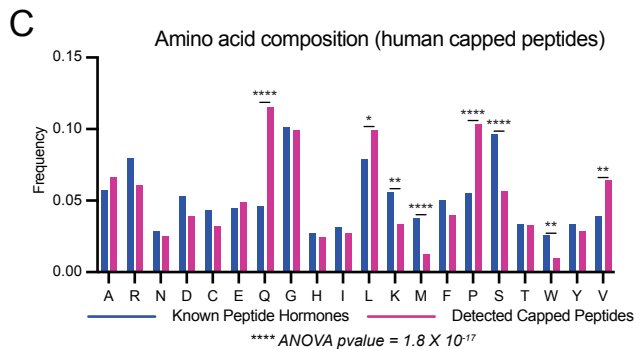

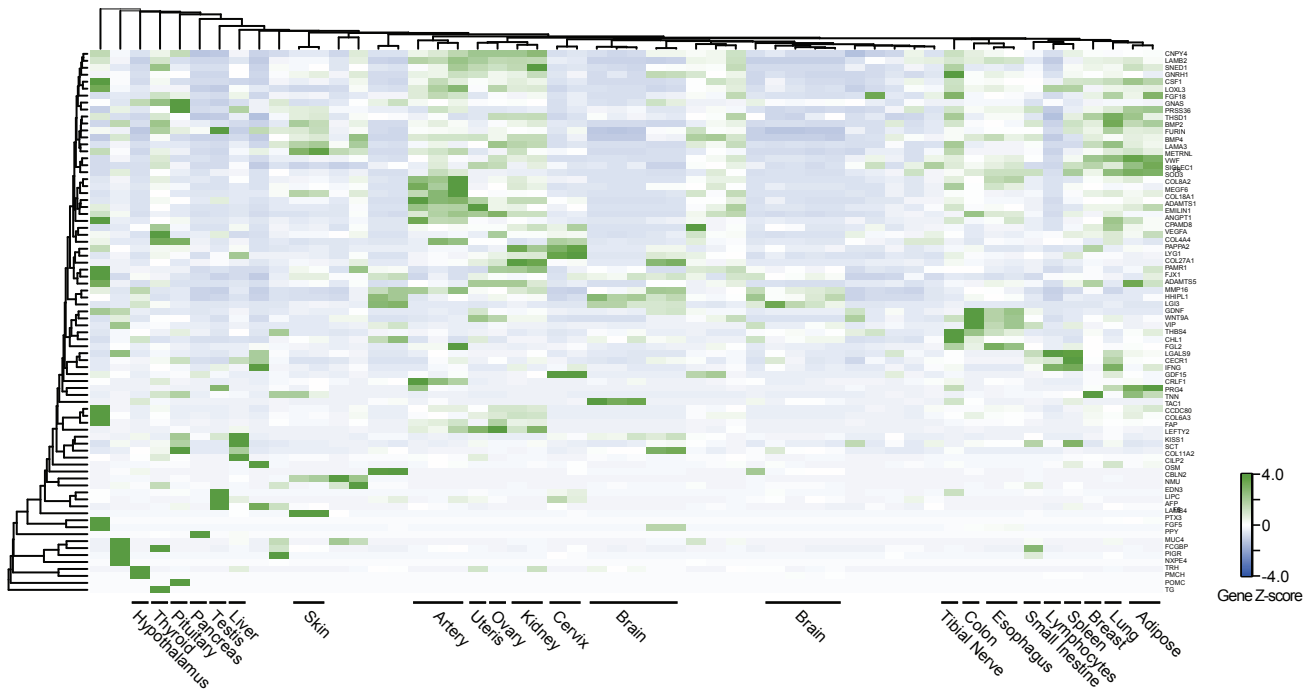

Fig. S5
